# Supplementary material for: Nanoseed-assisted synthesis of nano-sized SAPO-34 zeolites using morpholine as the sole template with superior MTO performance
Source: Royal Society of Chemistry journal article supplement (doi:10.1039/c7cc07508a), 2017-01-01
Supplement: c7cc07508a1.pdf [file c7cc07508a1.pdf]

**Electronic Supplementary Information (ESI)**

**Nanoseed-assisted Synthesis of Nanosized SAPO-34 Zeolite Using  
Morpholine as the Sole Template with Superior MTO  
Performance**

**Guangrui Chen,<sup>a</sup> Qiming Sun,<sup>\*a</sup> and Jihong Yu<sup>\*a, b</sup>**

<sup>a</sup> State Key Laboratory of Inorganic Synthesis and Preparative Chemistry, College of Chemistry, Jilin University, Changchun 130012, People's Republic of China

<sup>b</sup> International Center of Future Science, Jilin University, 2699 Qianjin Street, Changchun 130012, People's Republic of China

## Synthesis method

**Reagents.** Aluminum iso-propoxide ( $\text{Al}(\text{OPr}^i)_3$ , 99.5 wt%, Beijing Reagents Company), Phosphoric acid ( $\text{H}_3\text{PO}_4$ , 85 wt%, Beijing Chemical Works), Colloidal silica (40 wt%, Aldrich), Tetraethyl orthosilicate (TEOS, Fuyu Reagents Company), Morpholine (MOR,  $\text{C}_4\text{H}_8\text{NO}$ , >98.5%, Fuyu Reagents Company), Tetraethylammonium hydroxide solution (TEAOH, 35 wt%, Alfa Aesar).

**Synthesis of nano-sized SAPO-34 seed.** The nanosized SAPO-34 seed was synthesized under conventional hydrothermal conditions from the starting gel with the molar composition of  $\text{Al/P/Si/TEAOH/H}_2\text{O}=1/1.2/0.3/1/20$  as reported in our previous work. Typically, the finely ground  $\text{Al}(\text{OPr}^i)_3$  was firstly added into TEAOH solution and deionized water until dissolved sufficiently. Phosphoric acid was then slowly added dropwise into the resultant solution, followed by a continuous stirring for 2 h. Finally, the colloidal silica was added dropwise into the synthesis gel. The resultant mixture was further stirred for 1 h, and was then transferred into a 100 ml Teflon-lined stainless steel autoclave, followed by static crystallization in a conventional oven at 170 °C for 3 days. The obtained zeolite products were centrifuged, washed and dried, followed by calcination at 550 °C for 6 h to remove templates.

**Synthesis of nano-sized SAPO-34 zeolites (SP34-S-X).** The nano-sized SAPO-34 zeolites were synthesized with the molar compositions of  $\text{Al/P/Si/MOR/H}_2\text{O}=1/1/0.3/x/40$  ( $x=2.5\sim0.6$ ) combined with the addition of 8.0 wt% seed (based on the  $\text{Al}_2\text{O}_3$ ) under hydrothermal conditions at 180 °C for 3 days. The obtained samples are named as SP34-S-X, wherein the X represents the ratio of MOR/Al. Typically, the finely ground  $\text{Al}(\text{OPr}^i)_3$  was firstly added into MOR solution and stirred for 1 h. Subsequently, the phosphoric acid was slowly added dropwise into the resultant solution, followed by a continuous stirring for 2 h. The TEOS was added dropwise into the synthesis gel and stirred for 2 h. Finally, the seed was added into the solution and then stirred for 3 h continuously until the seed was dissolved completely. The synthetic gel was then transferred into a 100 mL Teflon-lined stainless steel autoclave with static crystallization at 180 °C for 36 h. The obtained zeolite products were centrifuged, washed and dried, followed by calcination at 600 °C for 6 h to remove templates.

**Preparation of micron-sized SAPO-34 zeolites (SP34-N-X).** The micron-sized SAPO-34 zeolites were synthesized with the molar compositions of  $\text{Al/P/Si/MOR/H}_2\text{O}=1/1/0.3/x/40$  ( $x=2.5\sim0.6$ ) with the same synthesis procedure of nano-sized SAPO-34 zeolites without adding the seed. The obtained

samples are named as SP34-N-X, wherein the X represents the ratio of MOR/Al.

## Characterizations

X-ray diffraction patterns were recorded on powder X-ray diffraction on a Rigaku D-Max 2550 diffractometer using Cu K $\alpha$  radiation ( $\lambda = 1.5418 \text{ \AA}$ ). TEM images and SEM images were taken on a Tecnai F20 electron microscope operating at an acceleration voltage of 200 kV and a JSM-6510 (JEOL) electron microscope. Thermogravimetric (TG) analysis was performed on a TA company TGA Q500 unit in air at a heating rate of  $10 \text{ }^{\circ}\text{C min}^{-1}$  from room temperature to  $800 \text{ }^{\circ}\text{C}$  in air. Chemical compositions of samples were analyzed by inductively coupled plasma (ICP) using Perkin-Elmer Optima 3300 DV ICP instrument. The acidity of samples was characterized by temperature-programmed desorption of ammonia ( $\text{NH}_3$ -TPD) experiments using a Micromeritics AutoChem II 2920 automated chemisorption analysis unit. Nitrogen adsorption/desorption measurements were carried out on a Micromeritics 2020 analyzer at  $77.35 \text{ K}$  after the samples were degassed at  $350 \text{ }^{\circ}\text{C}$  under vacuum.  $^{29}\text{Si}$  NMR spectra were performed on a Bruker AVANCE III 400 WB spectrometer. The organic species retained in the nano-sized SAPO-34 catalysts after methanol conversion were analyzed by GC-MS (Thermo Fisher Trace ISQ, equipped with TG-5MS column,  $60 \text{ m} \times 320 \text{ }\mu\text{m} \times 25 \text{ }\mu\text{m}$ ).

## MTO Catalytic Tests

Methanol conversion was performed in a quartz tubular fixed-bed reactor at atmospheric pressure. The catalyst (300 mg, 40-60 mesh) loaded in the quartz reactor (6 mm inner diameter) was activated at  $500 \text{ }^{\circ}\text{C}$  in a  $\text{N}_2$  flow of  $30 \text{ ml min}^{-1}$  for 1 h before starting each reaction run and then the temperature was adjusted to reaction temperature of  $450 \text{ }^{\circ}\text{C}$ . The methanol was fed by passing the carrier gas ( $15 \text{ mL/min}$ ) through a saturator containing methanol at  $49 \text{ }^{\circ}\text{C}$ , which gave a WHSV of  $4.0 \text{ h}^{-1}$ . The reaction products were analyzed using an on-line gas chromatograph (Agilent GC 7890N), equipped with a flame ionization detector (FID) and Plot-Q column (Agilent J&W GC Columns, HP-PLOT/Q 19091P-Q04,  $30 \text{ m} \times 320 \text{ }\mu\text{m} \times 20 \text{ }\mu\text{m}$ ). The conversion and selectivity were calculated on  $\text{CH}_2$  basis and dimethyl ether (DME) was considered as reactant in the calculation.

The amount of generated coke in SAPO-34 catalysts after the MTO reactions was determined by

thermal analysis (TG) on a TGA Q500 at a heating rate of  $10\text{ }^{\circ}\text{C min}^{-1}$  from room temperature to  $800\text{ }^{\circ}\text{C}$  under air flow. To analyze the coke species in the deactivated SAPO-34 catalysts, the deactivated catalysts were etched by HF solution for 24 h, and then extracted by  $\text{CH}_2\text{Cl}_2$ . Subsequently, the obtained solutions were analyzed by GC-MS. (Thermo Fisher Trace ISQ, equipped with TG-5MS column,  $60\text{ m} \times 320\text{ }\mu\text{m} \times 25\text{ }\mu\text{m}$ ).

## Figures and Tables

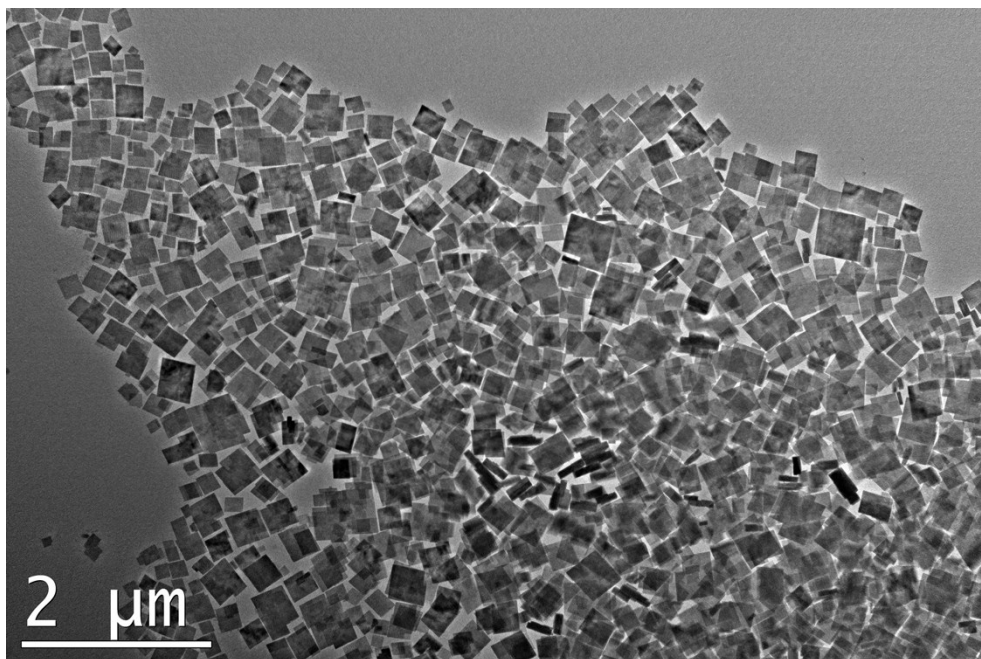

**Figure S1** TEM images of nanosheet-like SAPO-34 seeds synthesized using TEAOH as template.

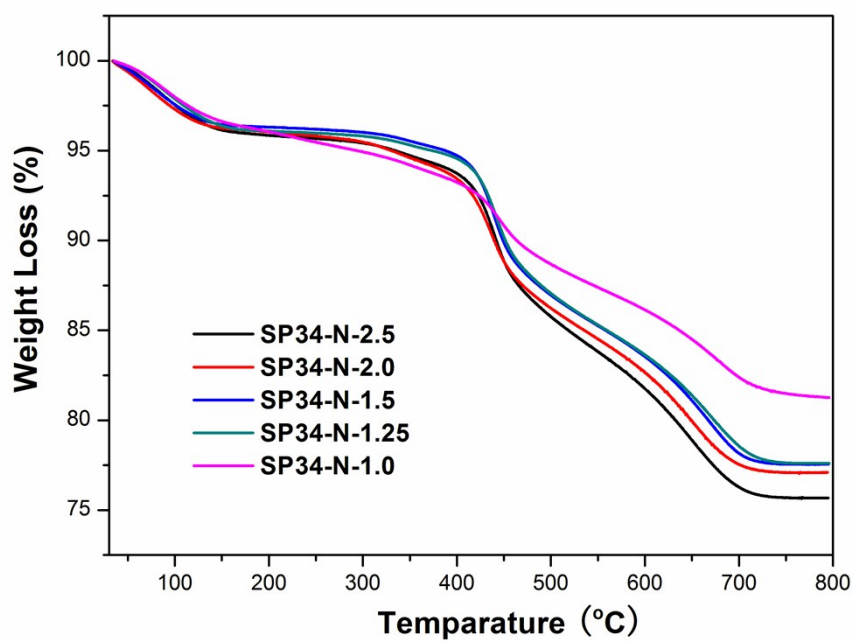

**Figure S2** TG curves of micron-sized SAPO-34 samples.

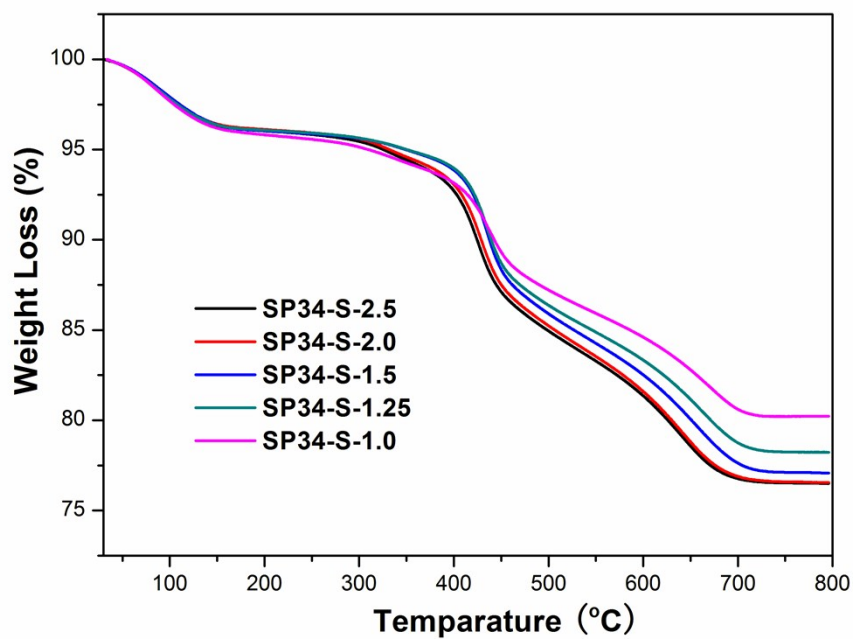

**Figure S3** TG curves of nano-sized SAPO-34 samples synthesized using nanoseed-assisted method.

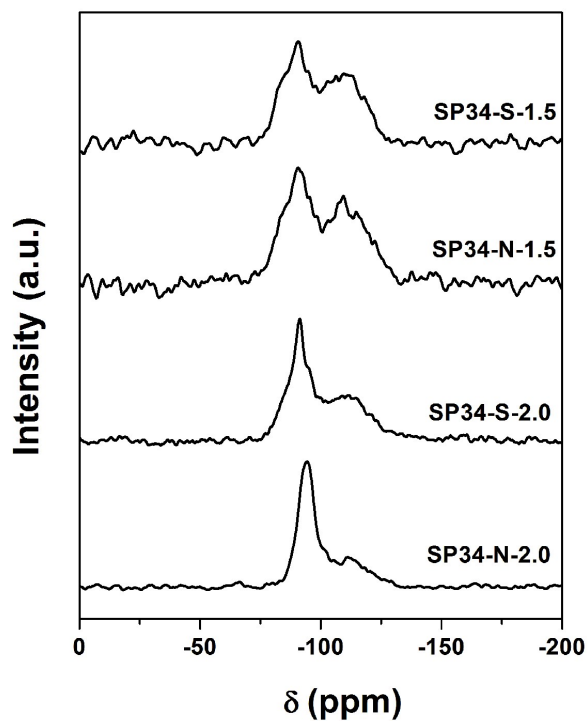

**Figure S4**  $^{29}\text{Si}$  MAS NMR spectra of micron-sized SAPO-34 samples SP34-N-2.0 and SP34-N-1.5, and nano-sized SAPO-34 samples SP34-S-2.0 and SP34-S-1.5.

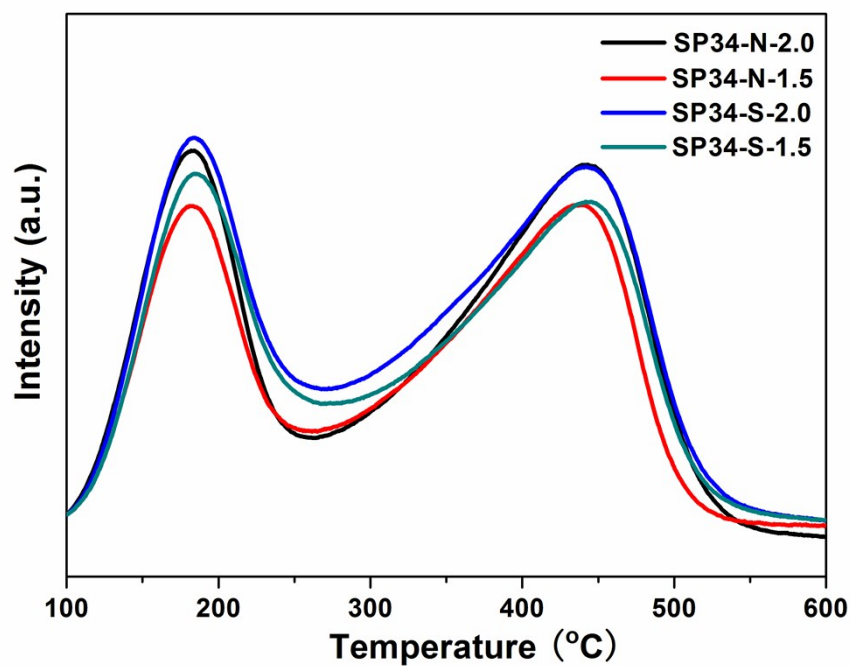

**Figure S5**  $\text{NH}_3$ -TPD profiles of micron-sized SAPO-34 samples SP34-N-2.0 and SP34-N-1.5, and nano-sized SAPO-34 samples SP34-S-2.0 and SP34-S-1.5.

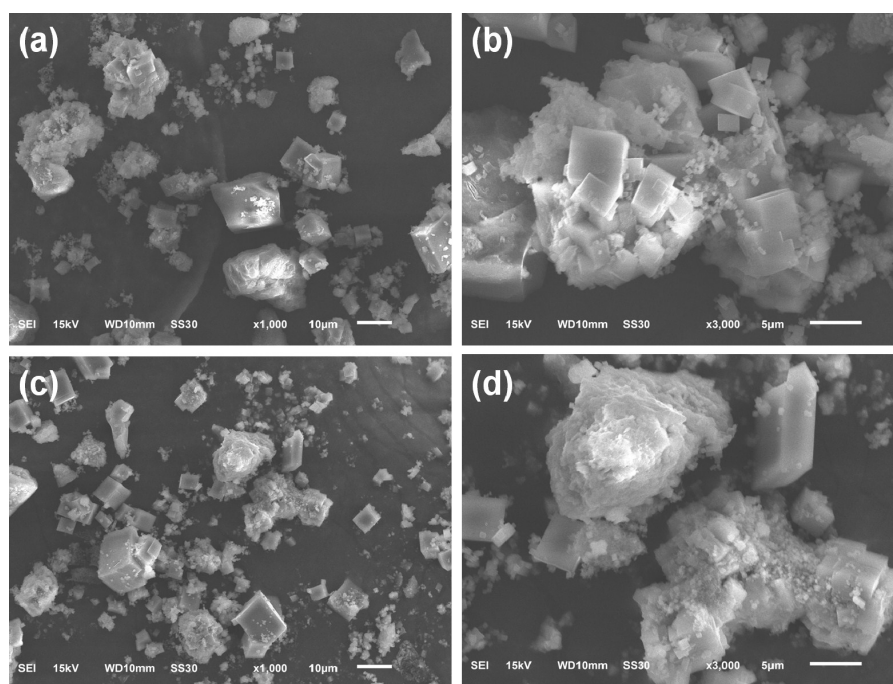

**Figure S6** SEM images of samples SP34-MS-2.0 (a, b) and SP34-MS-1.5 (c, d) using micron-sized SAPO-34 crystals as the seed (MS means addition of the micron-sized seed, and 2.0 and 1.5 represent the ratios of MOR/Al).

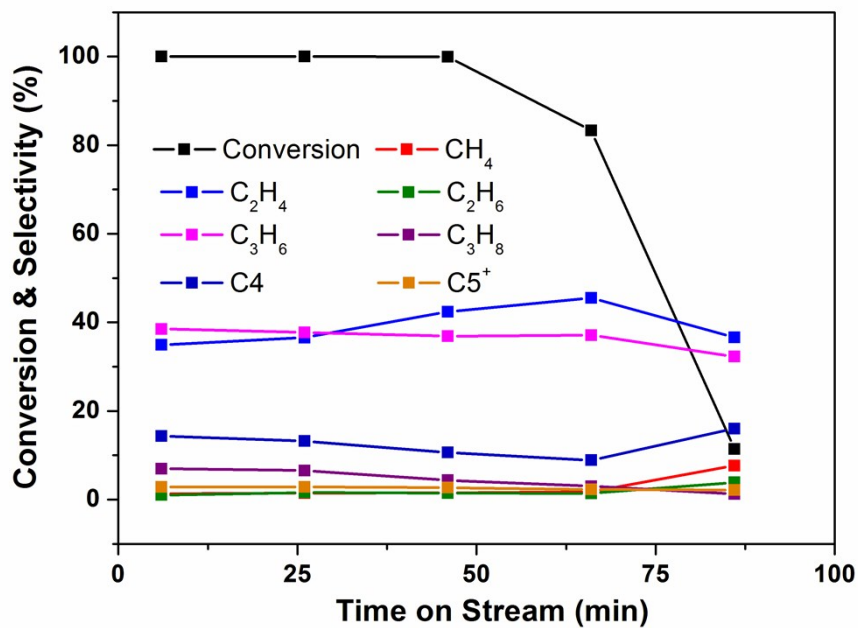

**Figure S7** Catalytic lifetime and products selectivity of micron-sized SAPO-34 catalyst SP34-N-2.0. Experimental conditions: WHSV = 4 h<sup>-1</sup>, T = 450 °C.

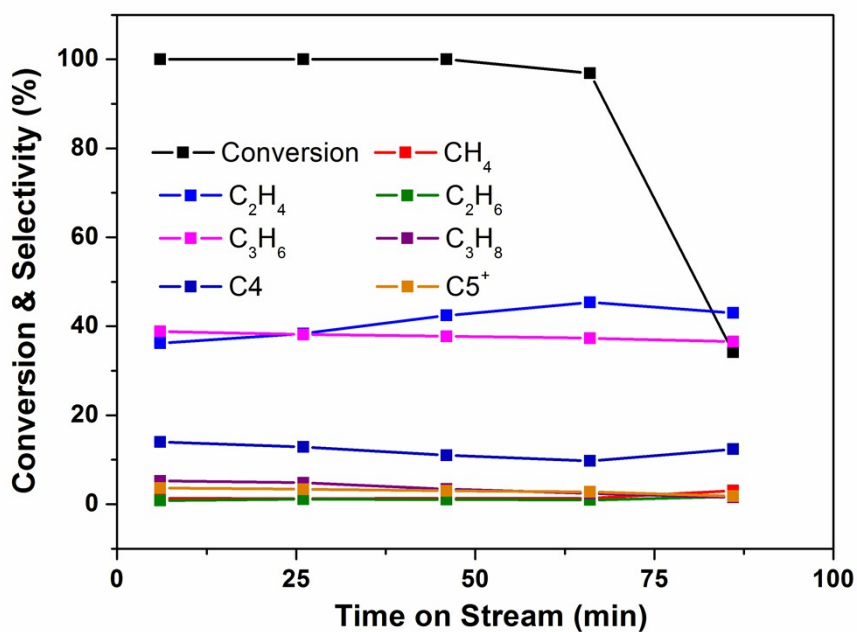

**Figure S8** Catalytic lifetime and products selectivity of micron-sized SAPO-34 catalyst SP34-N-1.5. Experimental conditions: WHSV = 4 h<sup>-1</sup>, T = 450 °C.



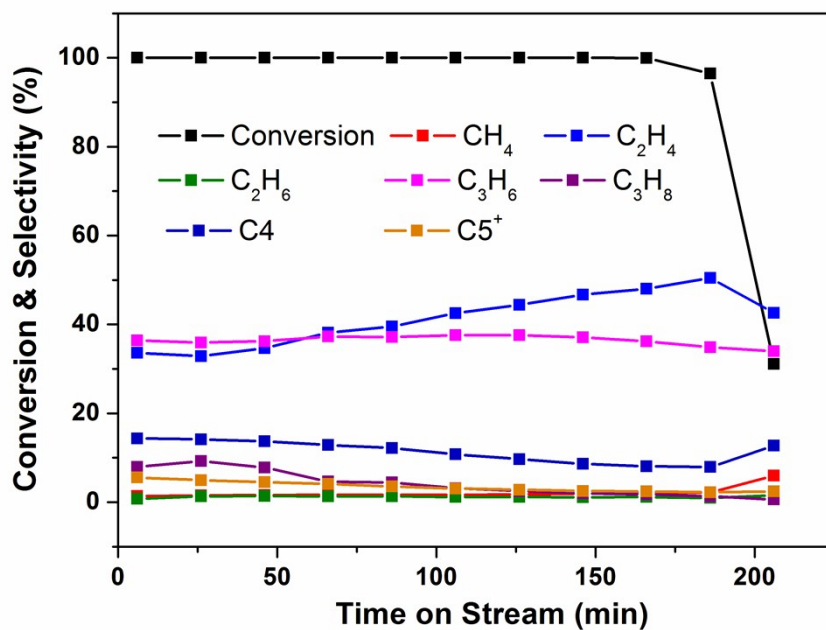

**Figure S9** Catalytic lifetime and products selectivity of nano-sized SAPO-34 catalyst SP34-S-2.0.

Experimental conditions: WHSV = 4 h<sup>-1</sup>, T = 450 °C.

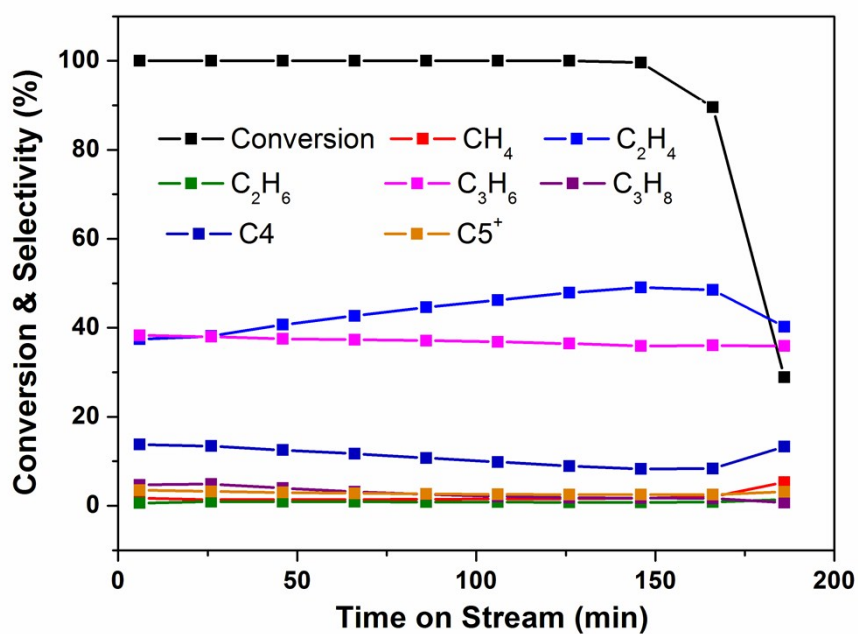

**Figure S10** Catalytic lifetime and products selectivity of nano-sized SAPO-34 catalyst SP34-S-1.5.

Experimental conditions: WHSV = 4 h<sup>-1</sup>, T = 450 °C.

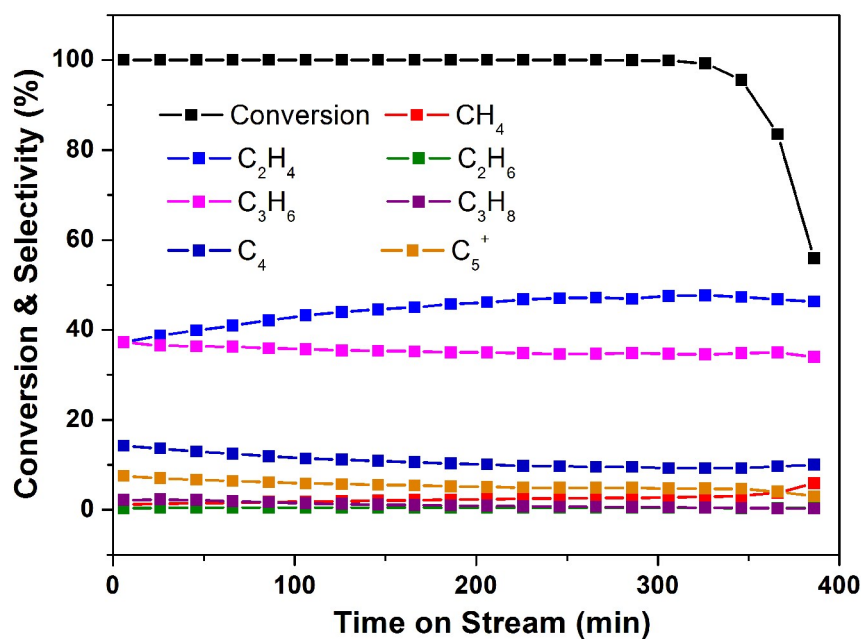

**Figure S11** Catalytic lifetime and products selectivity of nanosheet-like SAPO-34 seed catalyst using TEAOH as template. Experimental conditions: WHSV = 4 h<sup>-1</sup>, T = 450 °C.

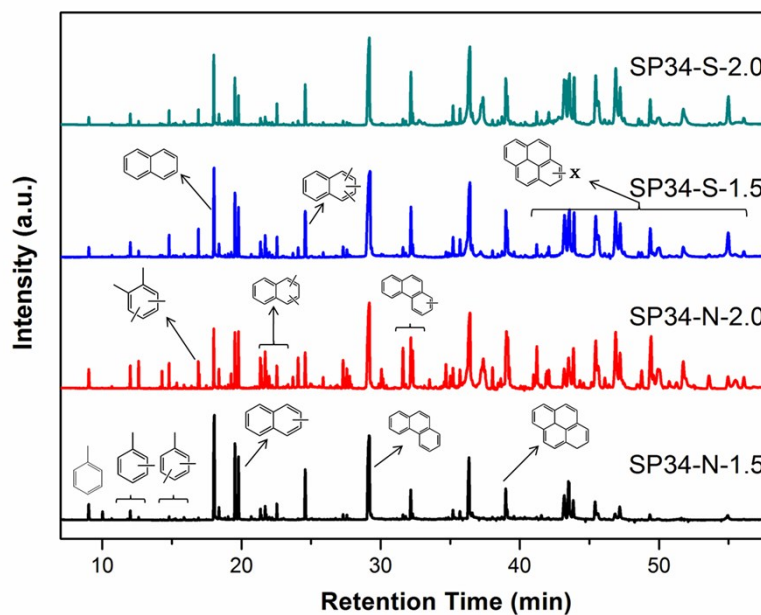

**Figure S12** GC-MS chromatograms of occluded organic species retained in deactivated SAPO-34 catalysts SP34-S-2.0, SP34-S-1.5, SP34-N-2.0 and SP34-N-1.5. The structures annotated onto the chromatograms are peak identifications in comparison with the mass spectra to those in the NIST database.

**Table S1** MTO catalytic results of SP34-N-2.0, SP34-N-1.5, SP34-S-2.0 and SP34-S-1.5 catalysts.

| Catalysts                | TOS<br>(min) | Selectivity (%) |                               |                               |                               |                               |                |                |                             |                                                          |
|--------------------------|--------------|-----------------|-------------------------------|-------------------------------|-------------------------------|-------------------------------|----------------|----------------|-----------------------------|----------------------------------------------------------|
|                          |              | CH <sub>4</sub> | C <sub>2</sub> H <sub>4</sub> | C <sub>2</sub> H <sub>6</sub> | C <sub>3</sub> H <sub>6</sub> | C <sub>3</sub> H <sub>8</sub> | C <sub>4</sub> | C <sub>5</sub> | C <sub>6</sub> <sup>+</sup> | C <sub>2</sub> <sup>=</sup> +C <sub>3</sub> <sup>=</sup> |
| SP34-N-2.0               | 46*          | 1.5             | 42.4                          | 1.5                           | 36.9                          | 4.4                           | 10.6           | 2.3            | 0.4                         | 79.3                                                     |
| SP34-N-1.5               | 46*          | 1.3             | 42.0                          | 1.1                           | 37.7                          | 3.4                           | 11.0           | 2.5            | 0.5                         | 79.7                                                     |
| SP34-S-2.0               | 166*         | 2.2             | 48.1                          | 1.2                           | 36.2                          | 1.8                           | 8.1            | 2.0            | 0.4                         | 84.3                                                     |
| SP34-S-1.5               | 126*         | 1.6             | 47.9                          | 0.8                           | 36.5                          | 1.8                           | 8.9            | 2.1            | 0.4                         | 84.4                                                     |
| Nanosheets<br>-like Seed | 286*         | 2.6             | 47.0                          | 0.4                           | 34.9                          | 0.6                           | 9.5            | 2.6            | 4.9                         | 81.9                                                     |

Reaction conditions: WHSV = 4 h<sup>-1</sup>, T = 450 °C.

\* Lifetime: the reaction duration with > 99.9% methanol conversion.

**Table S2** The rates of coke formation in methanol conversion over of SP34-N-2.0, SP34-N-1.5, SP34-S-2.0 and SP34-S-1.5 catalysts.

| Catalysts  | Coke (mg/g Cat.) <sup>(a)</sup> | TOS (min) <sup>(b)</sup> | R <sub>coke</sub> (mg/min) <sup>(c)</sup> | P <sub>coke</sub> (g/g MeOH) <sup>(d)</sup> |
|------------|---------------------------------|--------------------------|-------------------------------------------|---------------------------------------------|
| SP34-N-2.0 | 169.9                           | 46                       | 1.12                                      | 0.055                                       |
| SP34-N-1.5 | 157.5                           | 46                       | 1.03                                      | 0.051                                       |
| SP34-S-2.0 | 211.6                           | 166                      | 0.38                                      | 0.019                                       |
| SP34-S-1.5 | 198.5                           | 126                      | 0.47                                      | 0.024                                       |

(a) Coke weight percent with > 99.9% methanol conversion;

(b) The reaction duration with > 99.9% methanol conversion;

(c) R<sub>coke</sub>(mg/min) = coke amount(mg)/reaction time (min);

(d) P<sub>coke</sub>(g/gMeOH) = coke amount (g)/methanol feedstock (g).
